# Supplementary material for: Clinical Significance of COVID-19 and Diabetes: In the Pandemic Situation of SARS-CoV-2 Variants including Omicron (B.1.1.529)
Source: MDPI journal article supplement (doi:10.3390/biology11030400), 2022-03-04
Supplement: s1 [file s1]

**Table S1.** Overview of the risk for COVID-19-related mortality according to the glycemic control status before hospitalization.

| Author            | Study Population                         | Region         | Period                 | No. of Patients                                                          | HbA1c level |         | Outcome   | Risk                                             | Ref. No. |
|-------------------|------------------------------------------|----------------|------------------------|--------------------------------------------------------------------------|-------------|---------|-----------|--------------------------------------------------|----------|
|                   |                                          |                |                        |                                                                          | mmol/mol    | %       |           |                                                  |          |
| Holman et al.     | Nationwide population-based cohort study | United Kingdom | March 1–May 6 2020     | T1D 264,390, T2D 2,874,020, COVID-19-related deaths: T1D 464, T2D 10,525 | 48–53       | 6.5–7.0 | Mortality | ref                                              | * [26]   |
|                   |                                          |                |                        |                                                                          | 59–74       | 7.6–8.9 |           | T1D: HR 1.16(0.81–1.67), T2D: HR 1.22(1.15–1.30) |          |
|                   |                                          |                |                        |                                                                          | 75–85       | 9.0–9.9 |           | T1D: HR 1.37(0.90–2.07), T2D: HR 1.36(1.24–1.50) |          |
|                   |                                          |                |                        |                                                                          | ≥86         | ≥ 10    |           | T1D: HR 2.23(1.50–3.30), T2D: HR 1.61(1.47–1.77) |          |
| Cariou et al.     | Multi-center cohort study                | France         | March 10–March 31 2020 | 846 HbA1c available, total: 1,317, T1D 39, T2D 1,166                     | <3          | <7.0    | Mortality | ref                                              | ** [27]  |
|                   |                                          |                |                        |                                                                          | 53–63       | 7.0–7.9 |           | OR 1.55(0.82–2.93)                               |          |
|                   |                                          |                |                        |                                                                          | 64–74       | 8.0–8.9 |           | OR 1.09(0.52–2.28)                               |          |
|                   |                                          |                |                        |                                                                          | ≥75         | ≥9      |           | OR 0.84(0.40–1.75)                               |          |
| Williamson et al. | Nationwide population-based cohort study | United Kingdom | January 1–May 6 2020   | Total 17,278,392, COVID-19-related deaths 10,926                         | < 58        | <7.5    | Mortality | HR: 1.31(1.24–1.37)                              | # [32]   |
|                   |                                          |                |                        |                                                                          | ≥58         | ≥7.5    |           | HR: 1.95(1.83–2.08)                              | #        |

T1D: type 1 diabetes, T2D: type 2 diabetes, HR: hazard ratio, OR: odds ratio. \* adjusted for sex, age, ethnicity, socioeconomic deprivation, renal impairment, BMI (body mass index), tobacco smoking status, and cardiovascular comorbidities. \*\* adjusted for sex and age. # adjusted for age, sex, BMI, smoking, IMD (index of multiple deprivation) quintile, and comorbidities: severe asthma, respiratory disease, chronic heart disease, liver disease, stroke, dementia, other neurological diseases, reduced kidney function, autoimmune diseases (rheumatoid arthritis, lupus or psoriasis) and other immunosuppressive conditions.

**Table S2.** Overview of the risk for adverse clinical outcomes of COVID-19 according to the blood glucose levels at admission.

| Author        | Study Population                         |                                                             | Region | Period                      | No. of Patients                                     | Parameter of Hyperglycemia |                 | Outcome                                                     | Risk                  | Ref.              |
|---------------|------------------------------------------|-------------------------------------------------------------|--------|-----------------------------|-----------------------------------------------------|----------------------------|-----------------|-------------------------------------------------------------|-----------------------|-------------------|
|               |                                          |                                                             |        |                             |                                                     |                            |                 |                                                             |                       | No.               |
| Cariou et al. | Multi-center cohort study                | Diabetes                                                    | France | March 10–31 2020            | 940 admission plasma glucose available, total 1,317 | PG                         | > 5.55 mmol/L   | Tracheal intubation and/or death within 7 days of admission | OR 1.28 (1.12–1.48)   | <sup>a</sup> [27] |
|               |                                          |                                                             |        |                             |                                                     |                            |                 | 7-day mortality                                             | OR 1.20 (0.98–1.46)   | <sup>a</sup>      |
| Wang et al.   | Multi-center retrospective cohort study  | Hospitalized patients without a previous diagnosed diabetes | China  | January 24–February 10 2020 | 605                                                 | FBG                        | ≥ 7.0 mmol/L    | Mortality                                                   | HR 2.30(1.49–3.55)    | [34]              |
|               |                                          |                                                             |        |                             |                                                     | FBG                        | < 6.0 mmol/L    |                                                             | ref                   |                   |
|               |                                          |                                                             |        |                             |                                                     |                            | 6.1–6.9 mmol/L  | In hospital complications *                                 | OR: 2.61(1.64–4.41)   |                   |
|               |                                          |                                                             |        |                             |                                                     |                            | ≥ 7.0 mmol/L    |                                                             | OR: 3.99(2.71–5.88)   |                   |
| Yang et al.   | Single-center, retrospective study       | Hospitalized                                                | China  | February 8– March 10 2020   | 263                                                 | FPG                        | 7.0–11.0 mmol/L | Mortality                                                   | HR 1.90(1.11–3.25)    | <sup>b</sup> [35] |
|               |                                          |                                                             |        |                             |                                                     |                            | ≥ 11.1 mmol/L   |                                                             | HR 2.09(1.21–3.64)    |                   |
| Zhang et al.  | Multi-center, retrospective cohort study | Hospitalized                                                | China  | January 1– March 17 2020    | 312                                                 | FBG                        | < 5.6 mmol/L    | Mortality                                                   | ref                   | [36]              |
|               |                                          |                                                             |        |                             |                                                     |                            | 5.6-6.9 mmol/L  |                                                             | HR 4.11(1.15–14.74)   | <sup>c</sup>      |
| Liu et al.    | Single-center, retrospective study       | Hospitalized                                                | China  | February 1–24 2020          | 255                                                 | FPG                        | < 7 mmol/L      |                                                             | ref                   | [37]              |
|               |                                          |                                                             |        |                             |                                                     |                            | 7–11.0 mmol/L   | ICU admission                                               | HR 5.538(2.269–13.51) | <sup>d</sup>      |
|               |                                          |                                                             |        |                             |                                                     |                            | ≥ 11.1 mmol/L   |                                                             | HR 11.55(4.45–29.99)  | <sup>d</sup>      |

|                |                                           |                 |       |                                |                             |          |                                                                                               |                                                                                                         |                                                      |              |      |
|----------------|-------------------------------------------|-----------------|-------|--------------------------------|-----------------------------|----------|-----------------------------------------------------------------------------------------------|---------------------------------------------------------------------------------------------------------|------------------------------------------------------|--------------|------|
| Wu et al.      | Two-center, retrospective study           | Hospitalized    | China | December 26 2019–March 15 2020 | 2,041                       | BG       | $\geq 6.1$ mmol/L                                                                             | Progression to critical cases/death among non-critical cases<br>In-hospital mortality in critical cases | HR 1.30(1.03–1.63)<br>HR 1.84(1.14–2.98)             | <sup>e</sup> | [38] |
| Liu et al.     | Two-center, retrospective cohort study    | Hospitalized    | China | N.d.                           | 123                         | FBG      | $\geq 6.5$ mmol/L                                                                             | Critical illness **                                                                                     | OR 1.249(1.032–1.521)                                |              | [39] |
| Fadini et al.  | Retrospective observational study         | Hospitalized    | Italy | February 21–April 20 2020      | 413                         | FPG      | Each 2 mmol/L increase                                                                        | Severity                                                                                                | RR 1.21(1.11–1.32)                                   |              | [40] |
| Smith et al.   | Single-center, retrospective study        | Hospitalized    | USA   | March 16–May 2 2020            | 184                         | mean FBG |                                                                                               | Severity (requiring intubation)                                                                         | Intubated: 238.0 mg/dL<br>Not intubated: 163.7 mg/dL |              | [41] |
| Zhang et al.   | Single-center, retrospective cohort study | Hospitalized    | China | February 8–March 21 2020       | 166                         | FPG      | $< 7.0$ mmol/L<br>with no history of diabetes<br>$\geq 7.0$ mmol/L<br>Secondary hyperglycemia | ICU admission, mechanical ventilation or death                                                          | ref<br>OR 2.61(0.86–7.88)                            | <sup>f</sup> | [42] |
| Li et al.      | Two-center, retrospective cohort study    | Diabetes        | China | December 31 2019–April 5 2020  | Total 132<br>T1D 2, T2D 130 | FBG      | $> 11$ mmol/L<br>$\leq 11$ mmol/L                                                             | Death<br>In-hospital complications ***                                                                  | OR 7.629(1.391–37.984)<br>OR 3.232(1.393–7.498)      |              | [43] |
| Klonoff et al. | Multi-center retrospective cohort study   | Admitted to ICU | USA   | March 10–31 2020               | Total 1,544<br>ICU patients | BG       | $< 7.77$ mmol/L<br>$> 13.88$ mmol/L                                                           | Mortality                                                                                               | ref<br>HR 3.14(1.44–6.88)                            | <sup>g</sup> | [44] |

|                 |                                    |              |       |                          |     |                    |                                                      |                             |           |                     |              |      |
|-----------------|------------------------------------|--------------|-------|--------------------------|-----|--------------------|------------------------------------------------------|-----------------------------|-----------|---------------------|--------------|------|
| Li et al.       | Single-center, retrospective study | Hospitalized | China | January 22–March 17 2020 | 453 | Normal glucose     | < 5.6% HbA1c                                         |                             | Mortality | HR 1.00             |              | [45] |
|                 |                                    |              |       |                          |     | Hyperglycaemia     | Fasting glucose 5.6–6.9 mmol/L and/or HbA1c 5.7–6.4% |                             |           | HR 3.29(0.65–16.6)  | <sup>h</sup> |      |
|                 |                                    |              |       |                          |     | Newly diagnosed DM | ≥ 7 mmol/L and/or HbA1c ≥ 6.5%                       |                             |           | HR 9.42(2.18–40.7)  | <sup>h</sup> |      |
|                 |                                    |              |       |                          |     | Known diabetes     |                                                      |                             |           | HR 4.63 (1.02–21.0) | <sup>h</sup> |      |
| Coppelli et al. | Single-center, retrospective study | Hospitalized | Italy | March 20–April 30 2020   | 271 | BG                 | ≥ 7.78 mmol/L                                        | with no history of diabetes | Mortality | HR 1.80(1.03–3.15)  | <sup>a</sup> | [46] |

FPG: fasting plasma glucose, FBG: fasting blood glucose, T1D: type 1 diabetes, T2D: type 2 diabetes. \* ARDS, acute cardiac injury, acute kidney injury, acute liver injury, cerebrovascular accident, coagulopathy, secondary infection. \*\* critical illness as a composite of admission to the intensive care unit (ICU), respiratory failure requiring mechanical ventilation, septic shock during hospitalization, or death. \*\*\* SARS-CoV-2-related ARDS, acute cardiac injury, acute kidney injury and secondary infection. <sup>a</sup> adjusted for sex and age. <sup>b</sup> adjusted for sex. <sup>c</sup> adjusted for age, sex, hospitals and comorbidities. <sup>d</sup> adjusted for age, gender, and disease duration. <sup>e</sup> adjusted for all available factors in baseline characteristics. <sup>f</sup> adjusted for age, sex, BMI, medical histories of hypertension, cardiovascular disease and malignancy. <sup>g</sup> adjusted for sex, age, baseline BMI, history of diabetes, and HbA1c. <sup>h</sup> adjusted for age, sex, smoking, systolic blood pressure and total cholesterol.

**Table S3.** Overview of the risk for adverse clinical outcomes of COVID-19 according to the glycemic control during hospitalization.

| Author         | Study Population                               | Region                | Period | No. of Patients                 | Blood Glucose Level                                      |                    |                                                         | Outcome | Risk                                                         | Ref . No.                                |           |
|----------------|------------------------------------------------|-----------------------|--------|---------------------------------|----------------------------------------------------------|--------------------|---------------------------------------------------------|---------|--------------------------------------------------------------|------------------------------------------|-----------|
|                |                                                |                       |        |                                 |                                                          | mmol/<br>L         | mg/dL                                                   |         |                                                              |                                          |           |
| Wu et al.      | Two-center retrospective study                 | Critical cases        | China  | December 26 2019– March 15 2020 | Total 2041, non-critical 1690 at admission, critical 697 | median BG          | ≥ 6.1                                                   | ≥ 110   | Progression to critical cases/death among non-critical cases | HR 2.25 (1.78– 2.84)                     | * [38]    |
|                |                                                |                       |        |                                 |                                                          |                    |                                                         |         | In-hospital mortality among critical cases                   | HR 2.39 (1.41– 4.07)                     |           |
| Klonoff et al. | Multi-center retrospective cohort study        | Non-ICU patients      | USA    | March 10– March 31 2020         | Total 1,544, non-ICU 1,184                               | mean BG on day 2–3 | < 7.77                                                  | < 140   | Mortality                                                    | ref                                      | # [44]    |
|                |                                                |                       |        |                                 |                                                          |                    | > 13.88                                                 | > 250   |                                                              | HR 7.17(2.62– 19.62)                     |           |
| Bode et al.    | Multi-center retrospective observational study | Hospitalized patients | USA    | March 1– April 6 2020           | Total 1122, 184 in analysis                              |                    | ≥2 BGs > 180 mg/ dL within 24 hour with an HbA1c < 6.5% |         | Mortality                                                    | 41.7% vs 14.8%                           | [47]      |
|                |                                                |                       |        |                                 |                                                          |                    |                                                         |         | Lengths of hospital stay                                     | 6.2(1.1–20.7) days vs 5.0(1.1–24.6) days |           |
| Zhu et al.     | Multi-center retrospective cohort study        | Hospitalized patients | China  | December 30 2019– March 20 2020 | Total 7,337, Type 2 diabetes 952 (810 in analysis)       | BG                 | 3.9–10.0                                                | 70–180  | Mortality                                                    | HR 0.14 (0.03– 0.06)                     | & \$ [48] |
|                |                                                |                       |        |                                 |                                                          |                    |                                                         |         |                                                              |                                          |           |

\* adjusted for all available factors in baseline characteristics. # adjusted for sex, age, baseline BMI, history of diabetes, and admission BG. "&" In the propensity score-matched model, age, gender, hospital sites, indicators of the severity of COVID-19, comorbidities (hypertension, coronary heart disease, cerebral vascular disease, chronic liver disease, and chronic renal diseases), and incidence of increased creatinine were matched". \$ Mixed-effect Cox model using the hospital site as a random effect and adjusting imbalanced durations from symptom onset to admission.
